# Supplementary material for: HSPB5 Inhibition by NCI-41356 Reduces Experimental Lung Fibrosis by Blocking TGF-β1 Signaling
Source: MDPI journal article supplement (doi:10.3390/ph16020177), 2023-01-24
Supplement: s1 [file s1]

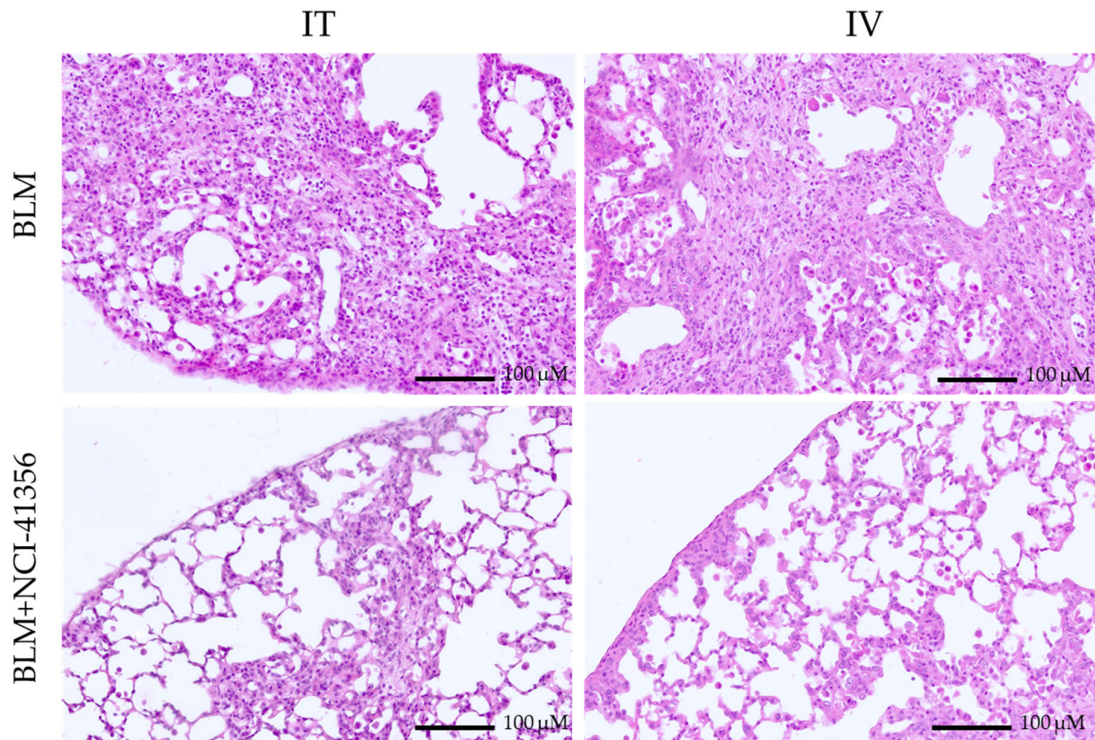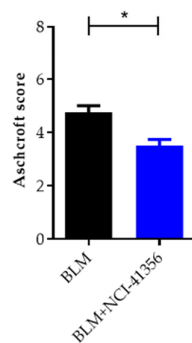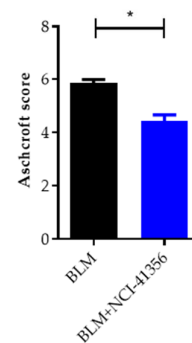

**Supplemental Figure S1. Ashcroft analysis of pulmonary fibrosis induced in bleomycin-treated mice treated or not with NCI-41356 by intra-tracheal (IT) or intravenous (IV) routes of administration.**

Top Left: Representative images of Haematoxylin and Eosine (H&E) staining of bleomycin-treated mice lungs treated or not with NCI-41356 (15 mg/kg) by intra-tracheal administration ( $\times 20$ ) and down left : Ashcroft score of evaluation of fibrosis of the same experimentation ( $n = 5$  /group).

Top right: Representative images of Haematoxylin and Eosine (H&E) staining of bleomycin-treated mice lungs treated or not with NCI-41356 (15 mg/kg) by intravenous administration ( $\times 20$ ) and down right: Ashcroft score of evaluation of fibrosis of the same experimentation ( $n = 5$ /group).

Ashcroft scores are expressed as means  $\pm$  SEM and compared using nonparametric Mann–Whitney test (B).

\*  $p = 0.0159$ .

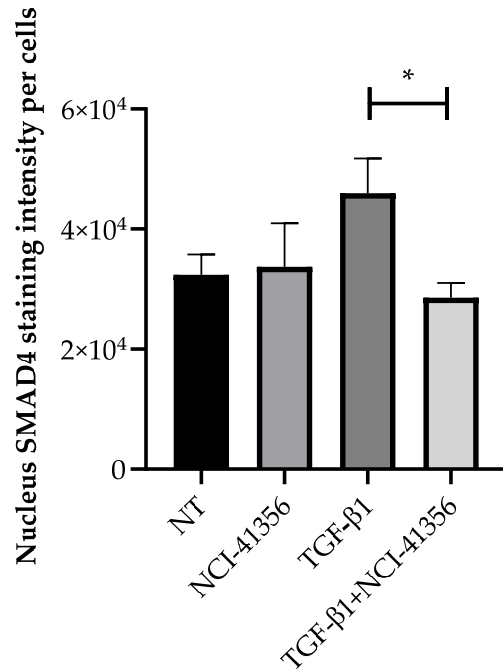

**Supplemental Figure S2. Immunofluorescence nucleic SMAD4 quantification evaluated on cells stimulated by TGF- $\beta$ 1 and treated by NCI-41356.**

SMAD4 nucleic protein level intensity on cells treated by NCI-41356 (100  $\mu$ M), TGF- $\beta$ 1 (10 ng/mL) or both compounds. Intensity are expressed as means  $\pm$  SEM and compared using nonparametric Mann-Whitney test. (\*  $p = 0.02$ ).
